# Supplementary material for: Austerity, measles and mandatory vaccination: cross-regional analysis of vaccination in Italy 2000–14
Source: Oxford University Press journal article supplement (doi:10.1093/eurpub/cky178), 2018-08-17
Supplement: cky178_supplementary_appendix.pdf [file cky178_supplementary_appendix.pdf]

**Austerity, measles and mandatory vaccination: cross-regional analysis of vaccination in Italy  
2000-2014 - Web Appendix 1**

Figure A1: Trends in public healthcare expenditure in preventive care per capita in Italy, 2006-2012.

Figure A2: Estimated association of MMR coverage and real public health expenditure per capita across 21 Italian regions, 2000-2014.

Figure A3 Estimated association of MMR coverage and real public health expenditure per capita across 20 Italian regions, 2000-2014.

Table A1: Descriptive Statistics.

Table A2: Estimated association of MMR coverage and real public health expenditure per capita across 20 Italian regions, 2000-2014

Table A3: Robustness test. Estimated association of MMR coverage and real public health expenditure per capita across 20/21 Italian regions, 2000-2014

Figure A1: Trends in real public healthcare expenditure in preventive care per capita in Italy, 2006-2012.

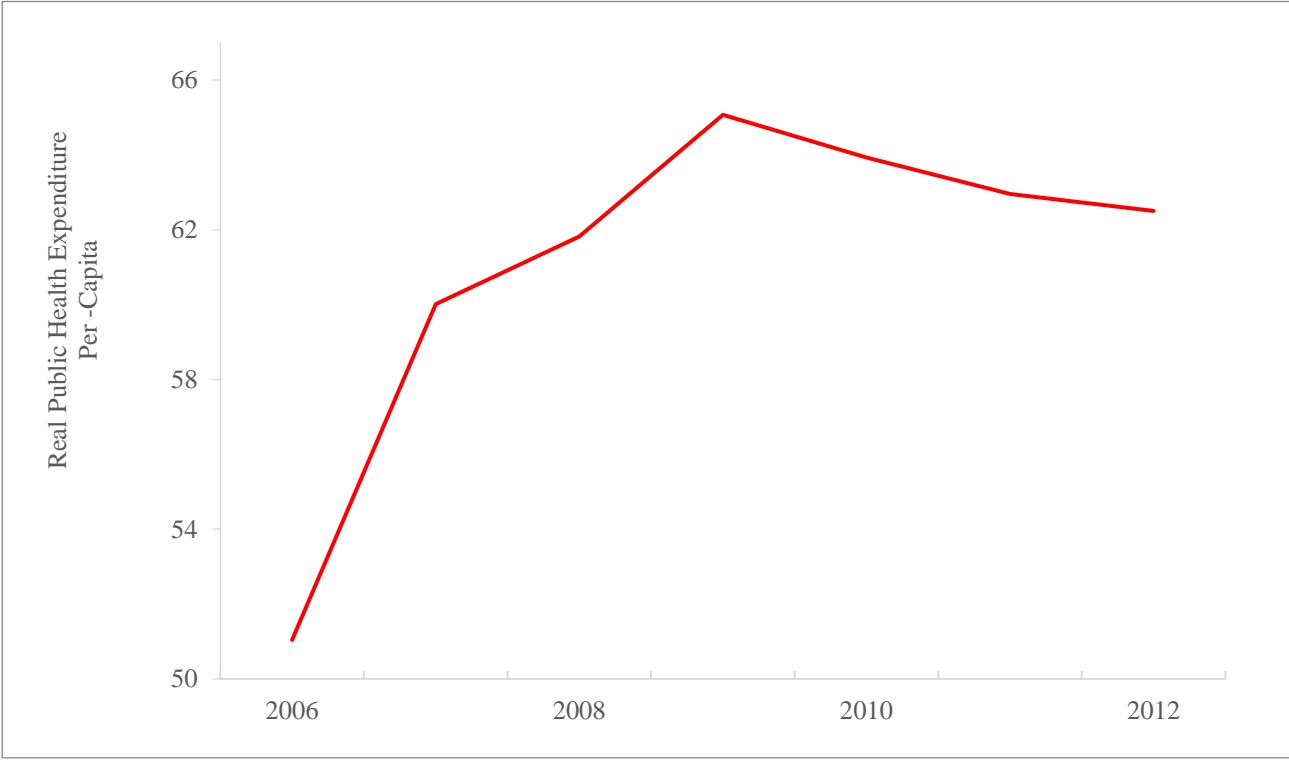

Note: Source: Italian Healthcare Institute<sup>1</sup>

Figure A2: Estimated association of MMR coverage and real public health expenditure per capita across 21 Italian regions, 2000-2014. Confidence intervals are based on robust standard errors, clustered at regional level. Models include the province of Bolzano. Adjusted model control for regional and region-specific time trends.

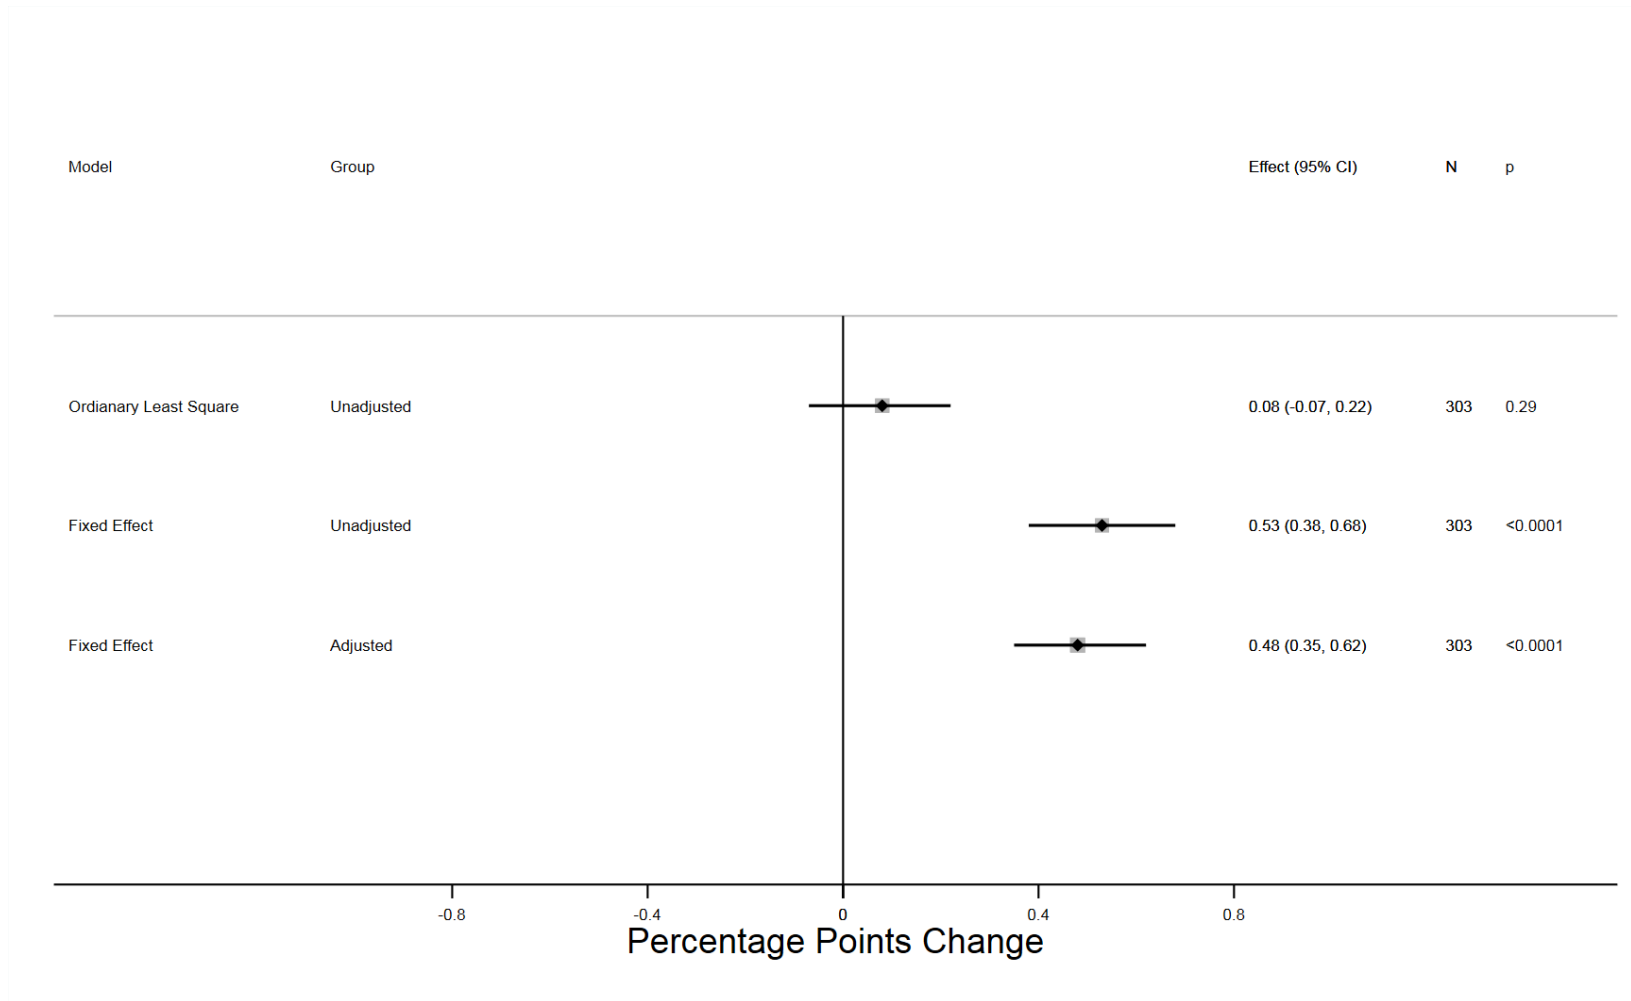

Figure A3: Adjusted association of MMR coverage and real public health expenditure per capita across 20 Italian regions, 2000-2014. Confidence intervals are based on robust standard errors, clustered at regional level. Adjusted model control for regional and region-specific time trends. Models are in logs and estimated coefficients represent elasticity.

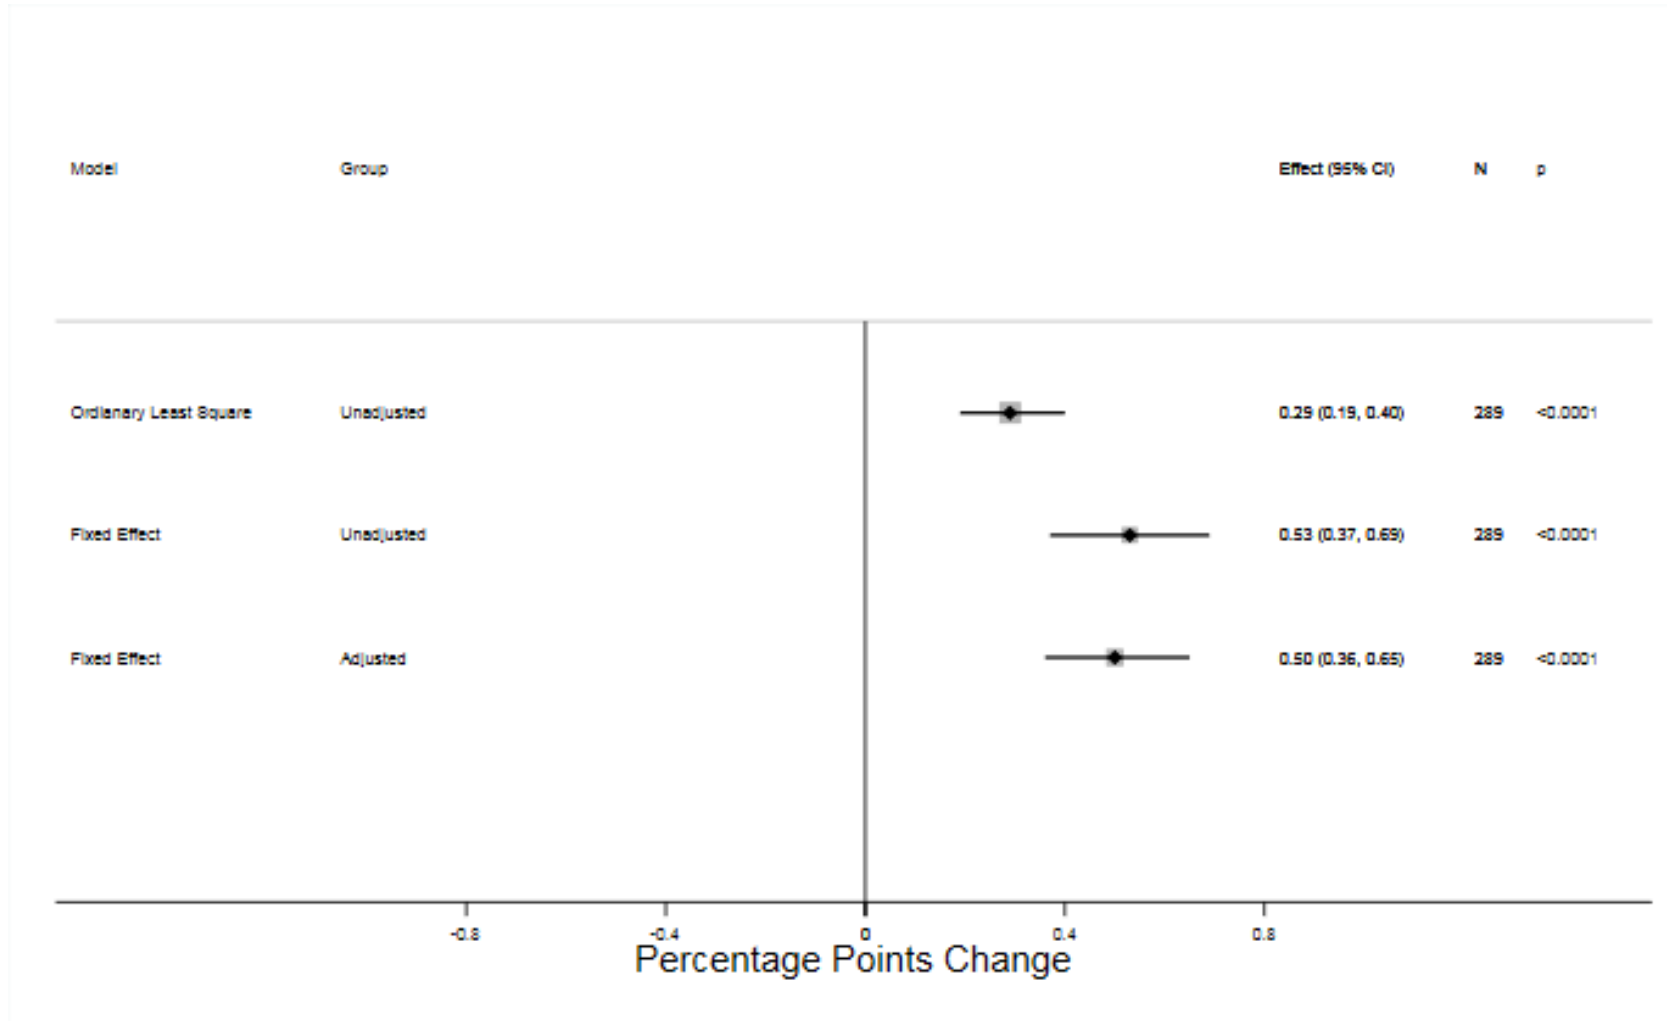

Table A1: Descriptive Statistics

| Variable                                             | Number of Region Years | Mean (S.D.) | Min. | Max. | Source |
|------------------------------------------------------|------------------------|-------------|------|------|--------|
| Per-capita Real Health Expenditure Per Year in Euros | 300                    | 1741 (178)  | 1198 | 2194 | HFA    |
| % of Population covered by MMR jab                   | 289                    | 87.5 (7.28) | 53   | 97.3 | ISS    |

*Notes:* Merged data at Regional level from Health for All (WHO)<sup>1</sup> and Superior Health Institute (ISS)<sup>1</sup> covering the period 2000-2014

Table A2: Estimated association of MMR coverage and real public health expenditure per capita across 20 Italian regions, 2000-2014.

|                                                          | Percentage<br>Points<br>Change in<br>MMR<br>coverage | Percentage<br>Points Change<br>in MMR<br>coverage | Percentage<br>Points<br>Change in<br>MMR<br>coverage |
|----------------------------------------------------------|------------------------------------------------------|---------------------------------------------------|------------------------------------------------------|
|                                                          | OLS                                                  | F.E.                                              | F.E.                                                 |
| Per 1 % increase in Per-capita<br>healthcare expenditure | 0.29***<br>[0.19, 0.40]                              | 0.53***<br>[0.37, 0.69]                           | 0.50***<br>[0.36, 0.65]                              |
| Time-trend                                               | N                                                    | N                                                 | Y                                                    |
| Regional-year Trends                                     | N                                                    | N                                                 | Y                                                    |
| Number of Observations                                   | 289                                                  | 289                                               | 289                                                  |

Notes: Source: Data from ISS and Health for All (2000-2014). The dependent represents the yearly change in MMR coverage at Regional and the main explanatory variable represents the yearly change real per-capita healthcare expenditure. Robust standard errors clustered at regional level and for repeated observations.

\*  $p < 0.05$  \*\*  $p < 0.01$  \*\*\*  $p < 0.001$

Table A3: Robustness test, Estimated association of MMR coverage and real public health expenditure per capita across 20/21 Italian regions, 2000-2014.

|                                                         | Percentage Points<br>Change<br>Including Bolzano<br>MMR coverage | Percentage Points<br>Change<br>Including Bolzano<br>MMR coverage | Percentage Points<br>Change<br>Including Bolzano<br>MMR coverage | %<br>Change<br>Model in Logs<br>MMR coverage | %<br>Change<br>Model in<br>Logs<br>MMR<br>coverage | %<br>Change<br>Model in<br>Logs<br>MMR<br>coverage |
|---------------------------------------------------------|------------------------------------------------------------------|------------------------------------------------------------------|------------------------------------------------------------------|----------------------------------------------|----------------------------------------------------|----------------------------------------------------|
|                                                         | OLS                                                              | F.E.                                                             | F.E.                                                             | OLS                                          | F.E.                                               | F.E.                                               |
| Per 1% increase in Per-capita<br>healthcare expenditure | 0.08*<br>[-0.07, 0.22]                                           | 0.53***<br>[0.38, 0.68]                                          | 0.48***<br>[0.35, 0.62]                                          | 0.37***<br>[0.23, 0.52]                      | 0.68***<br>[0.47, 0.89]                            | 0.64***<br>[0.45, 0.84]                            |
| Time-trend                                              | N                                                                | N                                                                | Y                                                                | N                                            | N                                                  | Y                                                  |
| Regional-year Trends                                    | N                                                                | N                                                                | Y                                                                | N                                            | N                                                  | Y                                                  |
| Number of Observations                                  | 303                                                              | 303                                                              | 303                                                              | 289                                          | 289                                                | 289                                                |

*Notes:* Source: Data from ISS and Health for All (2000-2014). The dependent represents the yearly change in MMR coverage at Regional and the main explanatory variable represents the yearly change real pro-capita healthcare expenditure. Robust standard errors clustered at regional level and for repeated observations.

\*  $p < 0.05$  \*\*  $p < 0.01$  \*\*\*  $p < 0.001$

## References

1. (ISS) IHI. Coperture Vaccinali MPR 2000-2016, 2017.
